# Supplementary material for: Thermal and photoinduced spin-crossover of mononuclear FeII complexes based on bppCHO ligand
Source: Royal Society of Chemistry journal article supplement (doi:10.1039/d1dt03664e), 2021-12-01
Supplement: d1dt03664e1.pdf [file d1dt03664e1.pdf]

## Thermal and photoinduced spin-crossover of mononuclear Fe<sup>II</sup> complexes based on bppCHO ligand

*Qianqian Yang, Yin-Shan Meng, Tao Liu and Jinkui Tang\**

**Table S1** Crystallographic data of complex **1**·ClO<sub>4</sub> at different temperature.

| <i>T</i> /K                                                 | 173                                                                               | 300                                                                               | 340                                                                               | 380                                                                               |
|-------------------------------------------------------------|-----------------------------------------------------------------------------------|-----------------------------------------------------------------------------------|-----------------------------------------------------------------------------------|-----------------------------------------------------------------------------------|
| Formula                                                     | C <sub>24</sub> H <sub>18</sub> Cl <sub>2</sub> FeN <sub>10</sub> O <sub>10</sub> | C <sub>24</sub> H <sub>18</sub> Cl <sub>2</sub> FeN <sub>10</sub> O <sub>10</sub> | C <sub>24</sub> H <sub>18</sub> Cl <sub>2</sub> FeN <sub>10</sub> O <sub>10</sub> | C <sub>24</sub> H <sub>18</sub> Cl <sub>2</sub> FeN <sub>10</sub> O <sub>10</sub> |
| CCDC                                                        | 2084783                                                                           | 2116762                                                                           | 2116763                                                                           | 2116764                                                                           |
| Mr [g·mol <sup>-1</sup> ]                                   | 733.23                                                                            | 733.23                                                                            | 733.23                                                                            | 733.23                                                                            |
| Crystal system                                              | monoclinic                                                                        | monoclinic                                                                        | monoclinic                                                                        | monoclinic                                                                        |
| Space group                                                 | <i>P</i> 2 <sub>1</sub> / <i>c</i>                                                |
| Color                                                       | Red                                                                               | Red                                                                               | Red                                                                               | Red                                                                               |
| <i>a</i> [Å]                                                | 18.4496(8)                                                                        | 18.5579(1)                                                                        | 18.5932(2)                                                                        | 18.6559(1)                                                                        |
| <i>b</i> [Å]                                                | 8.9454(4)                                                                         | 9.0000(5)                                                                         | 9.0163(8)                                                                         | 9.0330(7)                                                                         |
| <i>c</i> [Å]                                                | 17.2270(8)                                                                        | 17.3767(1)                                                                        | 17.4491(2)                                                                        | 17.5417(1)                                                                        |
| $\alpha$ [°]                                                | 90                                                                                | 90                                                                                | 90                                                                                | 90                                                                                |
| $\beta$ [°]                                                 | 94.149(3)                                                                         | 93.272(2)                                                                         | 92.848(3)                                                                         | 92.311(2)                                                                         |
| $\gamma$ [°]                                                | 90                                                                                | 90                                                                                | 90                                                                                | 90                                                                                |
| <i>V</i> [Å <sup>3</sup> ]                                  | 2835.7(2)                                                                         | 2897.5(3)                                                                         | 2921.6(5)                                                                         | 2953.7(4)                                                                         |
| <i>Z</i>                                                    | 4                                                                                 | 4                                                                                 | 4                                                                                 | 4                                                                                 |
| $\rho_{\text{calcd}}$ [g·cm <sup>-3</sup> ]                 | 1.717                                                                             | 1.681                                                                             | 1.667                                                                             | 1.649                                                                             |
| $\mu$ [mm <sup>-1</sup> ]                                   | 6.689/Cu-K $\alpha$                                                               | 0.781/Mo-K $\alpha$                                                               | 0.774/Mo-K $\alpha$                                                               | 0.766/Mo-K $\alpha$                                                               |
| <i>F</i> (000)                                              | 1488.0                                                                            | 1488.0                                                                            | 1488.0                                                                            | 1488.0                                                                            |
| 2 $\theta$ range [°]                                        | 4.80-124.85                                                                       | 4.396-50.134                                                                      | 4.674-50.06                                                                       | 4.37-50.116                                                                       |
| Reflns collected                                            | 21049                                                                             | 36216                                                                             | 37137                                                                             | 37423                                                                             |
| Unique reflns                                               | 4508                                                                              | 5111                                                                              | 5153                                                                              | 5210                                                                              |
| <i>R</i> <sub>int</sub>                                     | 0.0492                                                                            | 0.0763                                                                            | 0.0869                                                                            | 0.1132                                                                            |
| GOF                                                         | 1.033                                                                             | 1.137                                                                             | 1.108                                                                             | 1.074                                                                             |
| <i>R</i> <sub>1</sub> [ <i>I</i> ≥ 2 $\sigma$ ( <i>I</i> )] | 0.0381                                                                            | 0.0819                                                                            | 0.0584                                                                            | 0.0670                                                                            |
| <i>wR</i> <sub>2</sub> (all data)                           | 0.0923                                                                            | 0.2293                                                                            | 0.1860                                                                            | 0.2352                                                                            |

$$R_1 = \sum (|F_0| - |F_c|) / \sum |F_0| \quad \omega R_2 = \left[ \sum \omega (|F_0| - |F_c|)^2 / \sum \omega F_0^2 \right]^{1/2}$$

**Table S2** Crystallographic data of complex **1**·BF<sub>4</sub> at different temperature.

| <i>T</i> /K               | 180                                                                                            | 302                                                                                            | 340                                                                                            |
|---------------------------|------------------------------------------------------------------------------------------------|------------------------------------------------------------------------------------------------|------------------------------------------------------------------------------------------------|
| Formula                   | C <sub>24</sub> H <sub>20</sub> B <sub>2</sub> F <sub>8</sub> FeN <sub>10</sub> O <sub>3</sub> | C <sub>24</sub> H <sub>20</sub> B <sub>2</sub> F <sub>8</sub> FeN <sub>10</sub> O <sub>3</sub> | C <sub>24</sub> H <sub>20</sub> B <sub>2</sub> F <sub>8</sub> FeN <sub>10</sub> O <sub>3</sub> |
| CCDC                      | 2084784                                                                                        | 2116765                                                                                        | 2116766                                                                                        |
| Mr [g·mol <sup>-1</sup> ] | 725.97                                                                                         | 725.97                                                                                         | 725.97                                                                                         |
| Crystal system            | monoclinic                                                                                     | monoclinic                                                                                     | monoclinic                                                                                     |
| Space group               | <i>P</i> 2 <sub>1</sub> / <i>n</i>                                                             | <i>P</i> 2 <sub>1</sub> / <i>n</i>                                                             | <i>P</i> 2 <sub>1</sub> / <i>n</i>                                                             |

| Color                                                       | Red         | Red          | Red          |
|-------------------------------------------------------------|-------------|--------------|--------------|
| <i>a</i> [Å]                                                | 11.9099(5)  | 12.0228(7)   | 12.058(4)    |
| <i>b</i> [Å]                                                | 20.2023(8)  | 20.1916(1)   | 20.187(6)    |
| <i>c</i> [Å]                                                | 12.1694(4)  | 12.3173(6)   | 12.359(4)    |
| $\alpha$ [°]                                                | 90          | 90           | 90           |
| $\beta$ [°]                                                 | 90.8230(1)  | 91.178(2)    | 91.276(9)    |
| $\gamma$ [°]                                                | 90          | 90           | 90           |
| <i>V</i> [Å <sup>3</sup> ]                                  | 2927.75(2)  | 2989.5(3)    | 3007.6(16)   |
| <i>Z</i>                                                    | 4           | 4            | 4            |
| $\rho_{\text{calcd}}$ [g·cm <sup>-3</sup> ]                 | 1.647       | 1.613        | 1.603        |
| $\mu(\text{Mo-K}\alpha)$ [mm <sup>-1</sup> ]                | 0.614       | 0.602        | 0.598        |
| <i>F</i> (000)                                              | 1464.0      | 1464.0       | 1464.0       |
| 2 $\theta$ range [°]                                        | 3.908-50.07 | 3.874-50.044 | 3.864-50.248 |
| Reflns collected                                            | 38349       | 38435        | 38409        |
| Unique reflns                                               | 5145        | 5262         | 5322         |
| <i>R</i> <sub>int</sub>                                     | 0.0741      | 0.0985       | 0.1345       |
| GOF                                                         | 1.032       | 1.075        | 1.042        |
| <i>R</i> <sub>1</sub> [ <i>I</i> ≥ 2 $\sigma$ ( <i>I</i> )] | 0.0679      | 0.0687       | 0.0761       |
| <i>wR</i> <sub>2</sub> (all data)                           | 0.1868      | 0.2165       | 0.2441       |

$$R_1 = \sum (|F_0| - |F_c|) / \sum |F_0| \quad \omega R_2 = \left[ \frac{\sum \omega (|F_0| - |F_c|)^2}{\sum \omega F_0^2} \right]^{1/2}$$

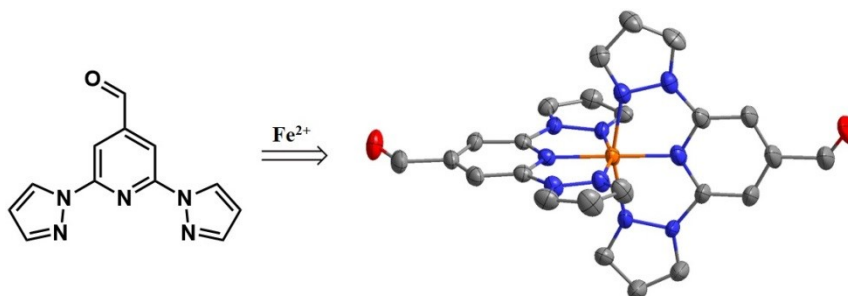

**Fig. S1** Schematic diagram of crystal structure of the mononuclear Fe complexes. The probability level of atomic displacement of the ellipsoid is 30%. Color code: Fe<sup>II</sup>, orange; N, blue; C, gray; O, red. The hydrogen atoms, anions, and solvent molecules have been omitted for clarity.

**Table S3** Selected bond distances (Å), angles (°), and *D*<sub>2d</sub> distortion parameters of complex **1**·ClO<sub>4</sub> at different temperature.

| <b>1</b> ·ClO <sub>4</sub> <sup>173</sup> |          |            |           |
|-------------------------------------------|----------|------------|-----------|
| Bond length (Å)                           |          |            |           |
| Fe1-N1                                    | 1.979(3) | Fe1-N6     | 1.956(2)  |
| Fe1-N3                                    | 1.887(2) | Fe1-N8     | 1.885(2)  |
| Fe1-N5                                    | 1.959(2) | Fe1-N10    | 1.960(3)  |
| Bond angle (°)                            |          |            |           |
| N3-Fe1-N1                                 | 79.99(1) | N6-Fe1-N10 | 160.80(1) |
| N3-Fe1-N5                                 | 80.69(1) | N8-Fe1-N1  | 103.12(1) |

|                                        |           |            |           |
|----------------------------------------|-----------|------------|-----------|
| N3-Fe1-N6                              | 99.72(1)  | N8-Fe1-N5  | 96.21(1)  |
| N3-Fe1-N10                             | 99.47(1)  | N8-Fe1-N6  | 80.29(1)  |
| N5-Fe1-N1                              | 160.68(1) | N8-Fe1-N10 | 80.52(1)  |
| N6-Fe1-N1                              | 93.51(1)  | N10-Fe1-N1 | 90.39(1)  |
| N6-Fe1-N5                              | 89.78(1)  | N10-Fe1-N5 | 92.74(1)  |
| N3-Fe1-N8 ( $\phi$ )                   | 176.89(1) | $\theta$   | 88.45(7)  |
| <b>1·ClO<sub>4</sub><sup>300</sup></b> |           |            |           |
| Bond length (Å)                        |           |            |           |
| Fe1-N1                                 | 1.962(4)  | Fe1-N5     | 1.981(3)  |
| Fe1-N2                                 | 1.958(3)  | Fe1-N6     | 1.880(3)  |
| Fe1-N4                                 | 1.885(3)  | Fe1-N10    | 1.965(3)  |
| Bond angle (°)                         |           |            |           |
| N1-Fe1-N10                             | 160.67(1) | N4-Fe1-N5  | 79.99(1)  |
| N1-Fe1-N5                              | 93.28(1)  | N4-Fe1-N2  | 80.74(1)  |
| N2-Fe1-N1                              | 90.23(1)  | N6-Fe1-N1  | 80.13(1)  |
| N2-Fe1-N10                             | 92.73(1)  | N6-Fe1-N10 | 80.56(1)  |
| N2-Fe1-N5                              | 160.72(1) | N6-Fe1-N5  | 102.76(1) |
| N4-Fe1-N1                              | 99.72(1)  | N6-Fe1-N2  | 96.51(1)  |
| N4-Fe1-N10                             | 99.61(1)  | N10-Fe1-N5 | 90.20(1)  |
| N6-Fe1-N4 ( $\phi$ )                   | 177.25(1) | $\theta$   | 88.56(9)  |
| <b>1·ClO<sub>4</sub><sup>340</sup></b> |           |            |           |
| Bond length (Å)                        |           |            |           |
| Fe1-N1                                 | 1.963(4)  | Fe1-N7     | 1.959(4)  |
| Fe1-N4                                 | 1.881(4)  | Fe1-N8     | 1.886(4)  |
| Fe1-N5                                 | 1.984(4)  | Fe1-N10    | 1.966(4)  |
| Bond angle (°)                         |           |            |           |
| N1-Fe1-N10                             | 160.62(2) | N7-Fe1-N10 | 92.79(2)  |
| N1-Fe1-N5                              | 93.32(2)  | N7-Fe1-N5  | 160.62(2) |
| N4-Fe1-N1                              | 80.15(2)  | N8-Fe1-N1  | 99.83(2)  |
| N4-Fe1-N10                             | 80.50(2)  | N8-Fe1-N10 | 99.55(2)  |
| N4-Fe1-N5                              | 102.82(2) | N8-Fe1-N5  | 80.01(2)  |
| N4-Fe1-N7                              | 96.55(2)  | N8-Fe1-N7  | 80.62(2)  |
| N7-Fe1-N1                              | 90.35(2)  | N10-Fe1-N5 | 90.04(2)  |
| N4-Fe1-N8 ( $\phi$ )                   | 177.17(2) | $\theta$   | 88.55(9)  |
| <b>1·ClO<sub>4</sub><sup>380</sup></b> |           |            |           |
| Bond length (Å)                        |           |            |           |
| Fe1-N1                                 | 1.891(5)  | Fe1-N5     | 1.980(5)  |
| Fe1-N2                                 | 1.967(6)  | Fe1-N8     | 1.897(5)  |
| Fe1-N4                                 | 1.970(6)  | Fe1-N10    | 1.969(5)  |
| Bond angle (°)                         |           |            |           |
| N1-Fe1-N4                              | 80.0(2)   | N4-Fe1-N5  | 93.4(2)   |
| N1-Fe1-N10                             | 80.2 (2)  | N8-Fe1-N4  | 99.9(2)   |
| N1-Fe1-N5                              | 103.15(2) | N8-Fe1-N10 | 99.9(2)   |
| N1-Fe1-N2                              | 96.8(2)   | N8-Fe1-N5  | 79.9(2)   |

|                      |          |            |          |
|----------------------|----------|------------|----------|
| N2-Fe1-N4            | 90.4(2)  | N8-Fe1-N2  | 80.1(2)  |
| N2-Fe1-N10           | 92.8(2)  | N10-Fe1-N4 | 160.1(2) |
| N2-Fe1-N5            | 160.0(2) | N10-Fe1-N5 | 90.3 (2) |
| N1-Fe1-N8 ( $\phi$ ) | 176.9(2) | $\theta$   | 88.60(1) |

**Table S4** Selected bond distances (Å), angles (°), and  $D_{2d}$  distortion parameters of complex **1·BF<sub>4</sub>** at different temperature.

| <b>1·BF<sub>4</sub><sup>180</sup></b> |           |            |           |
|---------------------------------------|-----------|------------|-----------|
| Bond length (Å)                       |           |            |           |
| Fe1-N1                                | 1.966(3)  | Fe1-N6     | 1.960(4)  |
| Fe1-N3                                | 1.879(3)  | Fe1-N8     | 1.885(3)  |
| Fe1-N5                                | 1.961(4)  | Fe1-N10    | 1.961(4)  |
| Bond angle (°)                        |           |            |           |
| N3-Fe1-N1                             | 80.55(1)  | N6-Fe1-N10 | 161.27(1) |
| N3-Fe1-N5                             | 80.72(1)  | N8-Fe1-N1  | 100.68(2) |
| N3-Fe1-N6                             | 98.99(1)  | N8-Fe1-N5  | 98.04(2)  |
| N3-Fe1-N10                            | 99.74(1)  | N8-Fe1-N6  | 80.53(1)  |
| N5-Fe1-N1                             | 161.25(2) | N8-Fe1-N10 | 80.75(1)  |
| N6-Fe1-N1                             | 91.89(1)  | N10-Fe1-N1 | 91.43(1)  |
| N6-Fe1-N5                             | 90.09(2)  | N10-Fe1-N5 | 92.66(2)  |
| N3-Fe1-N8 ( $\phi$ )                  | 178.68(1) | $\theta$   | 89.21(1)  |
| <b>1·BF<sub>4</sub><sup>300</sup></b> |           |            |           |
| Bond length (Å)                       |           |            |           |
| Fe1-N1                                | 1.960(4)  | Fe1-N6     | 1.959(4)  |
| Fe1-N3                                | 1.882(4)  | Fe1-N8     | 1.875(4)  |
| Fe1-N5                                | 1.961(4)  | Fe1-N10    | 1.960(4)  |
| Bond angle (°)                        |           |            |           |
| N1-Fe1-N5                             | 161.03(2) | N6-Fe1-N10 | 161.03(2) |
| N3-Fe1-N1                             | 80.53(2)  | N8-Fe1-N1  | 99.41(2)  |
| N3-Fe1-N5                             | 80.50(2)  | N8-Fe1-N5  | 99.57(2)  |
| N3-Fe1-N6                             | 100.80(2) | N8-Fe1-N6  | 80.50(2)  |
| N3-Fe1-N10                            | 98.15(2)  | N8-Fe1-N10 | 80.56(2)  |
| N6-Fe1-N1                             | 91.87(2)  | N10-Fe1-N1 | 90.21(2)  |
| N6-Fe1-N5                             | 91.37(2)  | N10-Fe1-N5 | 92.77(2)  |
| N8-Fe1-N3 ( $\phi$ )                  | 178.70(2) | $\theta$   | 89.25(1)  |
| <b>1·BF<sub>4</sub><sup>340</sup></b> |           |            |           |
| Bond length (Å)                       |           |            |           |
| Fe1-N1                                | 1.959(4)  | Fe1-N6     | 1.956(5)  |
| Fe1-N3                                | 1.874(4)  | Fe1-N8     | 1.884(4)  |
| Fe1-N5                                | 1.960(5)  | Fe1-N10    | 1.961(5)  |
| Bond angle (°)                        |           |            |           |
| N1-Fe1-N5                             | 160.75(2) | N6-Fe1-N1  | 91.94(2)  |
| N1-Fe1-N10                            | 91.35(2)  | N6-Fe1-N5  | 90.1(2)   |
| N3-Fe1-N1                             | 80.49(2)  | N6-Fe1-N10 | 160.97(2) |

|                      |           |            |           |
|----------------------|-----------|------------|-----------|
| N3-Fe1-N6            | 99.28(2)  | N8-Fe1-N1  | 100.81(2) |
| N3-Fe1-N5            | 80.28(2)  | N8-Fe1-N6  | 80.69(2)  |
| N3-Fe1-N10           | 99.75(2)  | N8-Fe1-N5  | 98.41(2)  |
| N5-Fe1-N10           | 92.9(2)   | N8-Fe1-N10 | 80.29(2)  |
| N3-Fe1-N8 ( $\phi$ ) | 178.69(2) | $\theta$   | 89.25(1)  |

**Table S5** The distortion parameters ( $^\circ$ ) of complexes  $\mathbf{1}\cdot\text{ClO}_4$  and  $\mathbf{1}\cdot\text{BF}_4$  at different temperature.

|                       | $\mathbf{1}\cdot\text{ClO}_4^{173}$ | $\mathbf{1}\cdot\text{ClO}_4^{300}$ | $\mathbf{1}\cdot\text{ClO}_4^{340}$ | $\mathbf{1}\cdot\text{ClO}_4^{380}$ | $\mathbf{1}\cdot\text{BF}_4^{180}$ | $\mathbf{1}\cdot\text{BF}_4^{300}$ | $\mathbf{1}\cdot\text{BF}_4^{340}$ |
|-----------------------|-------------------------------------|-------------------------------------|-------------------------------------|-------------------------------------|------------------------------------|------------------------------------|------------------------------------|
| $\Sigma$ ( $^\circ$ ) | 83.86(5)                            | 83.63(9)                            | 84.03(2)                            | 86.49(9)                            | 80.95(4)                           | 82.01(3)                           | 83.00(4)                           |
| $\Theta$ ( $^\circ$ ) | 282.32(8)                           | 282.02(6)                           | 283.66(8)                           | 290.78(3)                           | 264.95(1)                          | 268.93(2)                          | 271.37(2)                          |

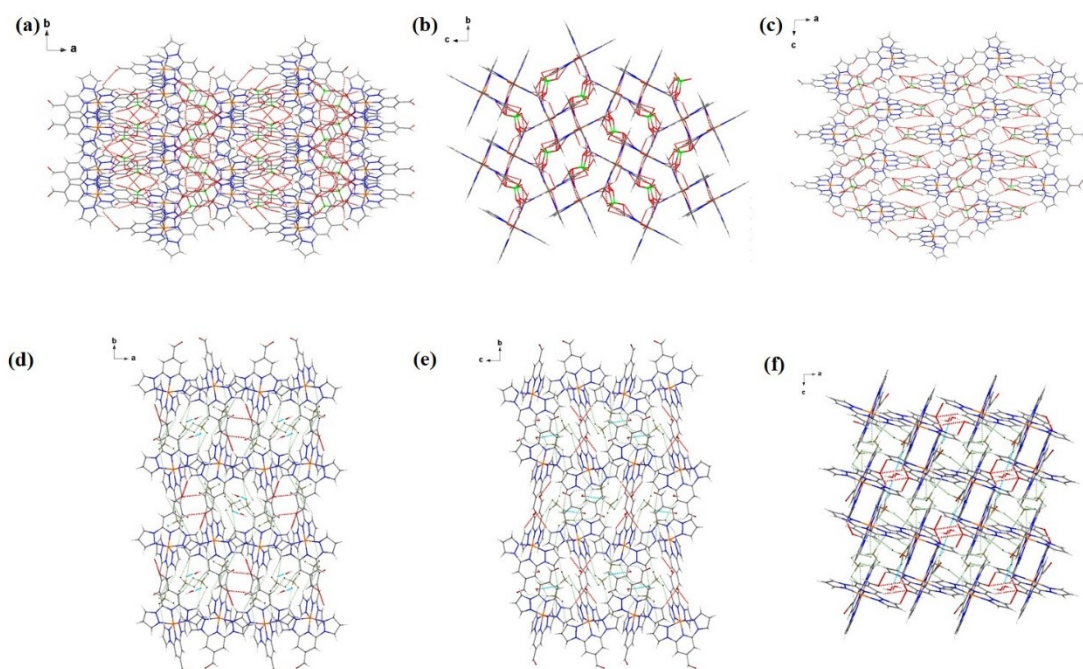

**Fig. S2** Short contacts and hydrogen bonds in the packing model of complexes  $\mathbf{1}\cdot\text{ClO}_4$  (a, b, and c) and  $\mathbf{1}\cdot\text{BF}_4$  (d, e, and f) at 173 and 180 K, respectively. Color code: Fe<sup>II</sup>, orange; N, blue; C, gray; O, red; Cl, bright green; F, light green; B, dark yellow; H, white. Short contacts are represented as dashed lines: C-H...O red, C-H...F light green. Hydrogen bonds are represented as dashed lines: O-H...F turquoise.

**Table S6** Interatomic distances ( $\text{\AA}$ ) of short contacts and hydrogen bonds for  $\mathbf{1}\cdot\text{ClO}_4$  and  $\mathbf{1}\cdot\text{BF}_4$ .

| $\mathbf{1}\cdot\text{ClO}_4^{173}$ |                      | $\mathbf{1}\cdot\text{BF}_4^{180}$ |                      |
|-------------------------------------|----------------------|------------------------------------|----------------------|
| D—H...A                             | H...A / $\text{\AA}$ | D—H...A                            | H...A / $\text{\AA}$ |
| C7-H7...O1                          | 2.462                | C3-H3...O1                         | 2.584                |
| C12-H12...O1                        | 2.486                | C5-H5...O1                         | 2.379                |
| C13-H13...O1                        | 2.373                | C15-H15...O1                       | 2.519                |
| C23-H23...O2                        | 2.535                | C10-H10...F1                       | 2.121                |
| C9-H9...O3                          | 2.378                | C11-H11...F2                       | 2.541                |
| C3-H3...O4                          | 2.679                | C8-H8...F3                         | 2.330                |
| C5-H5...O4                          | 2.594                | C13-H13...F4                       | 2.360                |
| C23-H23...O4                        | 2.678                | C12-H12...F5                       | 2.235                |

|               |       |              |       |
|---------------|-------|--------------|-------|
| C11-H11...O5  | 2.551 | C19-H19...F5 | 2.504 |
| C15-H15...O5  | 2.618 | C24-H24...F6 | 2.321 |
| C17-H17...O5  | 2.481 | C2-H2...F7   | 2.336 |
| C21-H21...O6  | 2.203 | C20-H20...F8 | 2.515 |
| C1-H1...O7    | 2.460 | C22-H22...F8 | 2.289 |
| C19-H19...O7  | 2.677 | O3-H3A...F2  | 2.153 |
| C11-H11...O8  | 2.702 |              |       |
| C23-H23...O9  | 2.509 |              |       |
| C14-H14...O10 | 2.617 |              |       |

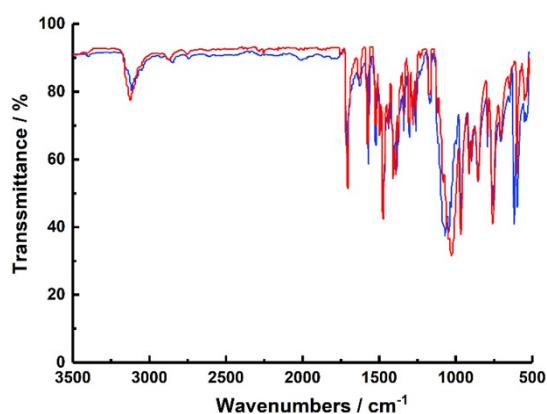

Fig. S3 IR spectra of complexes  $1 \cdot \text{ClO}_4$  (blue) and  $1 \cdot \text{BF}_4$  (red).

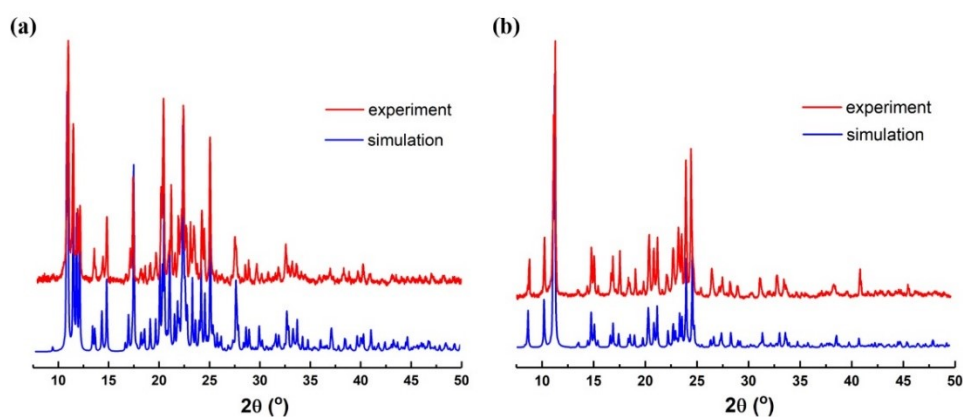

Fig. S4 Comparison between experiment and simulation of power XRD patterns of  $1 \cdot \text{ClO}_4$  (a) and  $1 \cdot \text{BF}_4$  (b) at room temperature.

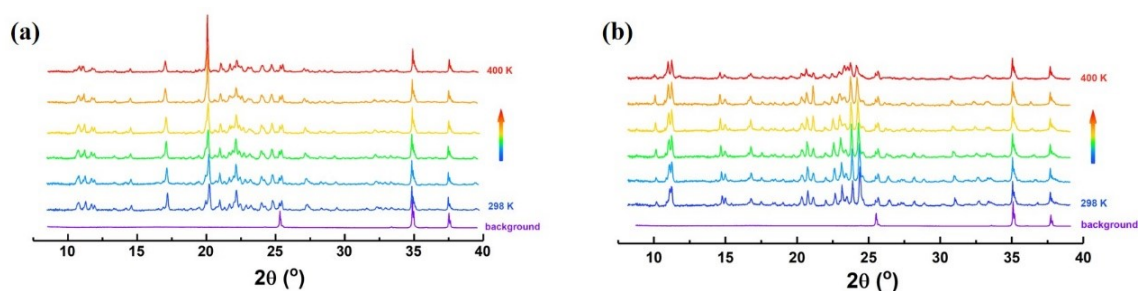

Fig. S5 Variable temperature powder XRD patterns of  $1 \cdot \text{ClO}_4$  (a) and  $1 \cdot \text{BF}_4$  (b).

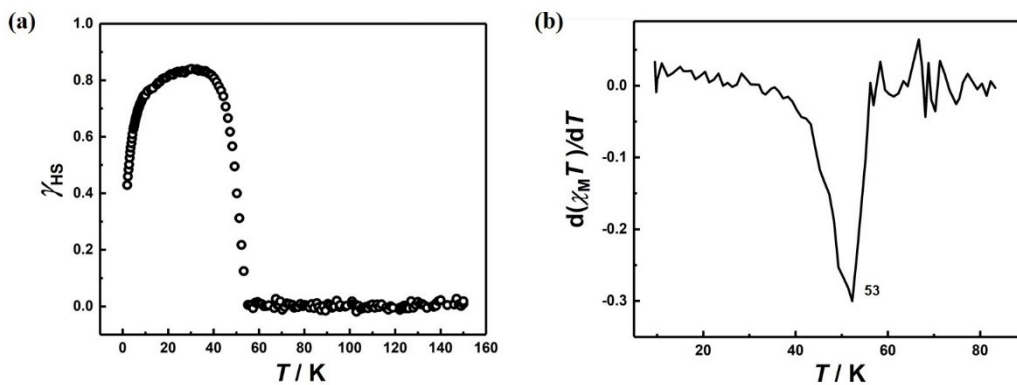

Fig. S6 (a)  $\gamma_{HS}$  versus  $T$  plot and (b) the  $d(\chi_M T)/dT$  versus  $T$  plot of  $1 \cdot ClO_4$  after irradiation.

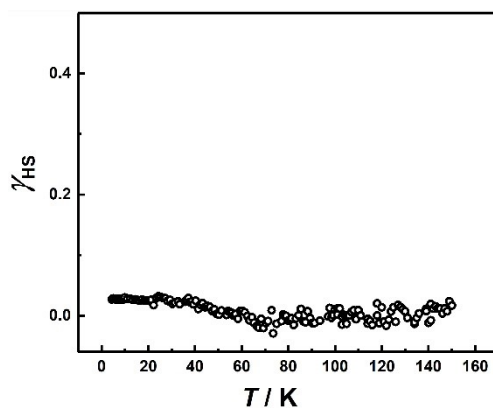

Fig. S7  $\gamma_{HS}$  versus  $T$  plot of  $1 \cdot BF_4$  after irradiation.

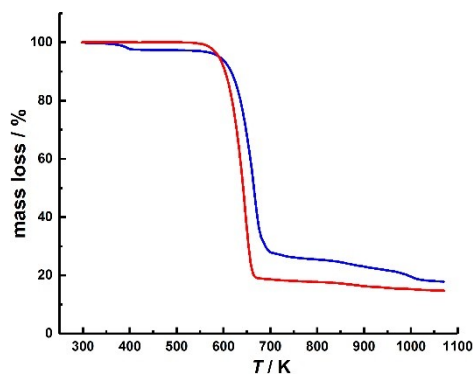

Fig. S8 Thermogravimetric profile of fresh (blue) and desolvated sample (red) of  $1 \cdot BF_4$  collected at a heating rate of  $10 \text{ }^\circ\text{C}/\text{min}$  in  $N_2$  atmosphere.

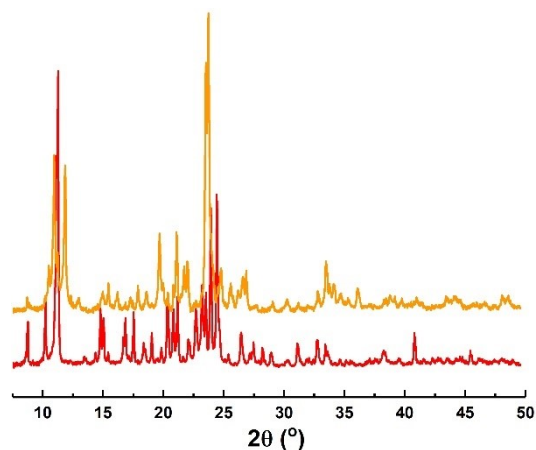

Fig. S9 Comparison between experiment of power XRD patterns of fresh (red) and desolvated sample (orange) of  $1 \cdot \text{BF}_4$  at room temperature.

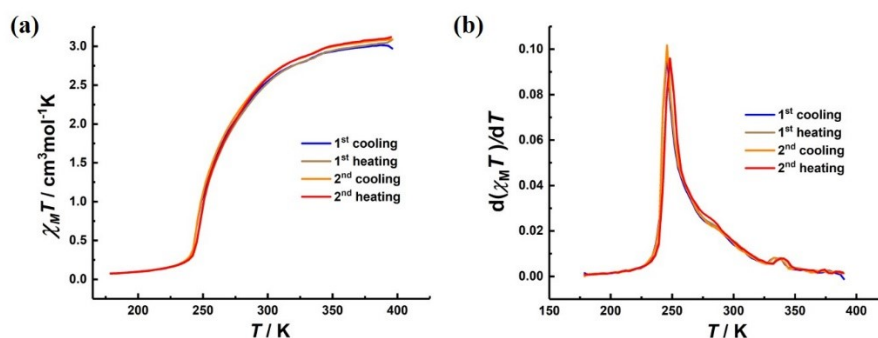

Fig. S10 (a)  $\chi_M T$  vs.  $T$  plots and (b)  $d(\chi_M T)/dT$  vs  $T$  plots of desolvated sample of complex  $1 \cdot \text{BF}_4$ .

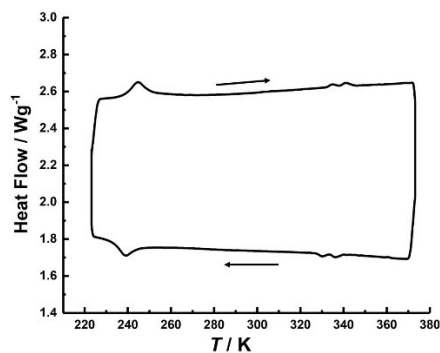

Fig. S11 DSC data for desolvated sample of  $1 \cdot \text{BF}_4$  measured by heating and cooling over  $-50$  to  $100$  °C at  $10$  °C/min.

Table S7 The enthalpy change and entropy change of fresh and desolvated sample of  $1 \cdot \text{BF}_4$ .

|                   |                                             | Step 1 | Step 2 | Step 3 |
|-------------------|---------------------------------------------|--------|--------|--------|
| Fresh sample      | $\Delta H/ \text{kJ mol}^{-1}$              | 1.37   | 0.83   | 2.07   |
|                   | $\Delta S/ \text{J mol}^{-1} \text{K}^{-1}$ | 4.01   | 2.49   | 8.34   |
| Desolvated sample | $\Delta H/ \text{kJ mol}^{-1}$              | 0.27   | 0.23   | 2.58   |
|                   | $\Delta S/ \text{J mol}^{-1} \text{K}^{-1}$ | 0.80   | 0.69   | 10.66  |
